# Supplementary material for: Cardiovascular dysautonomia in Achalasia Patients: Blood pressure and heart rate variability alterations
Source: PubMed Central journal article supplement (PMC7959365; doi:10.1371/journal.pone.0248106), 2021-03-15
Supplement: pone.0248106.s001.pdf [file pone.0248106.s001.pdf]

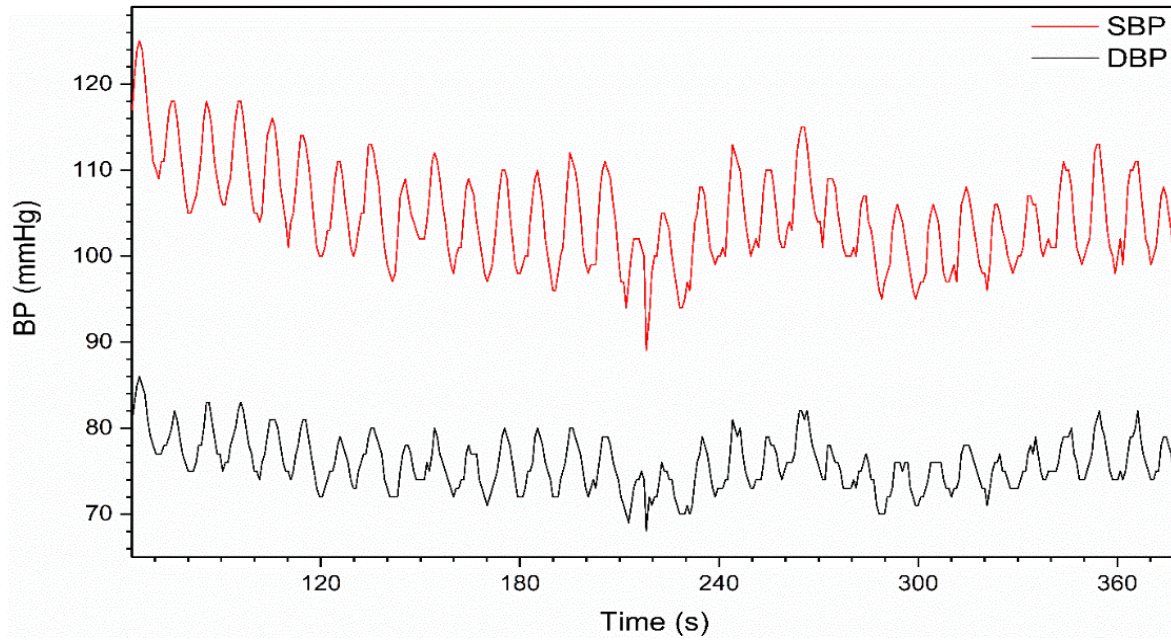

**S1 Fig.** SBP and DBP of a control man 21 years old breathing rhythmically at 0.1 recorded by the Portapress®.
