# Supplementary material for: Cardiovascular dysautonomia in Achalasia Patients: Blood pressure and heart rate variability alterations
Source: PubMed Central journal article supplement (PMC7959365; doi:10.1371/journal.pone.0248106), 2021-03-15
Supplement: pone.0248106.s002.pdf [file pone.0248106.s002.pdf]

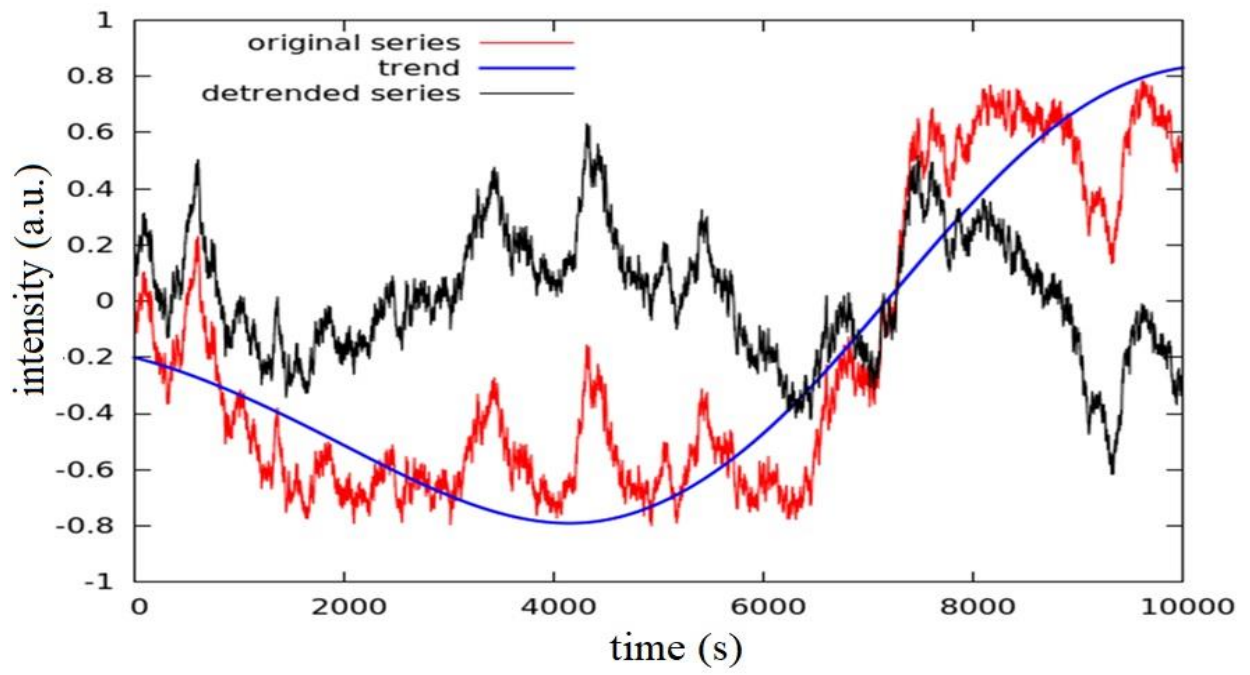

**S2 Fig.** Trend removal using Empirical Mode Decomposition.
