# Supplementary material for: Cardiovascular dysautonomia in Achalasia Patients: Blood pressure and heart rate variability alterations
Source: PubMed Central journal article supplement (PMC7959365; doi:10.1371/journal.pone.0248106), 2021-03-15
Supplement: pone.0248106.s003.pdf [file pone.0248106.s003.pdf]

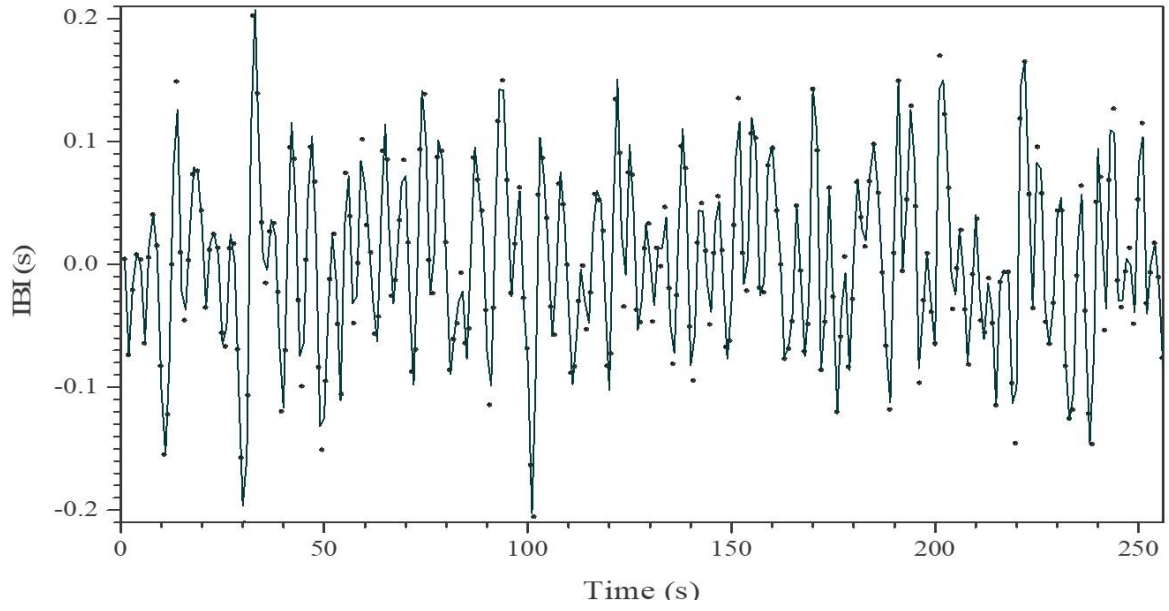

**S3 Fig.** Equidistant time-series of the interbeat interval (IBI) generated by cubic-spline interpolation. Dots are detrended data points and continuous line is interpolation.
